# Supplementary material for: Delineation of Homeostatic Immune Signatures Defining Viremic Non-progression in HIV-1 Infection
Source: PubMed Central journal article supplement (PMC7066316; doi:10.3389/fimmu.2020.00182), 2020-03-05
Supplement: Data_Sheet_1.pdf [file Data_Sheet_1.pdf]

## *Supplementary Material*

### **SUPPLEMENTARY DATA**

#### **Methods in genotyping of *vpr* and *env* gene**

##### **Preparation of proviral DNA**

Genomic DNA was extracted from PBMCs with QIAamp blood DNA mini kit (Qiagen, Valencia, CA) as per manufacturer's instruction. Isolated DNA was assessed for purity and further quantitated spectrophotometrically.

##### **PCR Amplification of *vpr* and *env*:**

Extracted genomic DNA was used as the template for amplification of *vpr* and *env* regions using nested PCR protocols. The reaction volume for the 1st round PCR of *vpr* (4066bp) was 50 $\mu$ L wherein ~1 $\mu$ g of template was amplified using 0.4 $\mu$ M each of Pro3F and PolVpuR2 primers, 1X PCR buffer with 2.5mM of MgCl<sub>2</sub>, 1.6mM of dNTPs Mix, 2.5U of LA Taq DNA polymerase (TaKaRa) and nuclease free H<sub>2</sub>O. Cycling conditions used for 1st round PCR were 94<sup>o</sup>C for 2 minutes followed by 10 cycles of (94<sup>o</sup>C 10 s, 60<sup>o</sup>C 30 s, 68<sup>o</sup>C 4 min), then 20 cycles of (94<sup>o</sup>C 10 s, 55<sup>o</sup>C 30 s, 68<sup>o</sup>C 4 min) followed by extension at 68<sup>o</sup>C for 10 minutes. Nested round PCR was carried out with 5 $\mu$ L of the 1st round product as template for amplification of the *vpr* region (671bp amplicon). The reaction was carried out in a volume of 50 $\mu$ L with 1X PCR buffer, 3.6mM of MgCl<sub>2</sub>, 1mM of dNTPs mix, 0.4  $\mu$ M each of VifB and Acc8R primers, 5U of Taq DNA polymerase (Bangalore Genei, India) and nuclease free H<sub>2</sub>O. Cycling conditions used were 3 cycles of 94<sup>o</sup>C for 1 minute, 55<sup>o</sup>C for 1 minute and 72<sup>o</sup>C for 1 min 40 seconds, 32 cycles of (94<sup>o</sup>C 15s, 55<sup>o</sup>C 45s, 72<sup>o</sup>C 1 min), followed by extension at 72<sup>o</sup>C for 5 minutes. For amplification of *env* region, two alternate approaches were used wherein the first round PCRs were carried out with primers ED3 and ED14 (2005bp) or ED5 and ED12 (1267bp) followed by second round PCRs with primers ED5 and ED33 (825bp amplicon) or ED31 and ED33 (565bp amplicon) respectively. Preparations of PCR master mix as well as cycling conditions were identical to *vpr* second round PCR described above. Detailed description of primers has been provided in supplementary Table 3. Final PCR products were run on 2% Agarose gel and examined under UV gel documentation system. PCR products were further purified with Nucleospin PCR gel purification kit (Machery Nagel) as per manufacturer's instructions.

## SUPPLEMENTARY TABLES AND FIGURES

## Tables

Supplementary Table 1: HIV-1 infected participants Characteristics

| Participants ID            | Gender | Age (Years) | Duration of infection (Years) | Absolute CD4+ T cell count | Absolute CD8+ T cell count | Viral load (Log <sub>10</sub> VL) |
|----------------------------|--------|-------------|-------------------------------|----------------------------|----------------------------|-----------------------------------|
| VNP1 <sup>#</sup>          | Female | 40          | 8                             | 629                        | 984                        | 4.7                               |
| VNP2                       | Female | 54          | 7                             | 582                        | 2781                       | 4.6                               |
| VNP3                       | Male   | 18          | 18                            | 505                        | 2106                       | 4.5                               |
| VNP4 <sup>*</sup>          | Female | 31          | 14                            | 704                        | 961                        | 4.0                               |
| <b>VNP5<sup>*#</sup></b>   | Male   | 49          | 11                            | 610                        | 1972                       | 5.3                               |
| VNP6                       | Female | 35          | 7                             | 520                        | 946                        | 4.7                               |
| VNP7 <sup>*</sup>          | Female | 30          | 8                             | 754                        | 1454                       | 5.1                               |
| <b>VNP8<sup>*</sup></b>    | Female | 40          | 8                             | 517                        | 805                        | 4.6                               |
| <b>VNP9<sup>*#</sup></b>   | Male   | 32          | 9                             | 589                        | 1829                       | 4.8                               |
| <b>VNP10<sup>*\$</sup></b> | Female | 35          | 16                            | 501                        | 2719                       | 5.3                               |
| VNP11                      | Male   | 43          | 13                            | 656                        | 1616                       | 4.1                               |
| VNP12                      | Female | 43          | 8                             | 570                        | 2675                       | 4.2                               |
| VNP13                      | Female | 46          | 10                            | 899                        | 622                        | 4.8                               |
| VNP14                      | Female | 45          | 12                            | 805                        | 1282                       | 4.5                               |
| VNP15                      | Female | 44          | 10                            | 618                        | 1057                       | 4.4                               |
| VNP16 <sup>*</sup>         | Female | 40          | 12                            | 645                        | 1328                       | 4.6                               |
| <b>VNP17<sup>*</sup></b>   | Female | 37          | 12                            | 866                        | 1818                       | 4.4                               |
| VNP18 <sup>#</sup>         | Female | 40          | 9                             | 910                        | 962                        | 4.2                               |
| <b>PuP19<sup>*#</sup></b>  | Male   | 21          | 2                             | 520                        | 1020                       | 4.5                               |
| <b>PuP20<sup>*#</sup></b>  | Male   | 32          | 0.8                           | 553                        | 1421                       | 6.0                               |
| PuP21                      | Female | 35          | 1                             | 545                        | 613                        | 4.5                               |
| PuP22 <sup>#</sup>         | Female | 27          | 1                             | 719                        | 979                        | 5.6                               |
| PuP23                      | Female | 32          | 0.6                           | 588                        | 611                        | 3.4                               |
| PuP24 <sup>*#</sup>        | Female | 51          | 2                             | 510                        | 2249                       | 3.6                               |
| <b>PuP25<sup>*#</sup></b>  | Female | 53          | 1                             | 518                        | 1372                       | 5.0                               |
| PuP26 <sup>*#</sup>        | Male   | 36          | 1                             | 710                        | 1520                       | 3.8                               |
| PuP27 <sup>*#</sup>        | Male   | 59          | 0.8                           | 641                        | 1334                       | 4.1                               |
| <b>PuP28<sup>*#</sup></b>  | Male   | 28          | 1                             | 630                        | 2001                       | 4.7                               |
| PuP29 <sup>*</sup>         | Female | 25          | 3                             | 514                        | 1850                       | 4.0                               |
| PuP30 <sup>#</sup>         | Male   | 57          | 1.5                           | 534                        | 1226                       | 5.5                               |
| PuP31 <sup>*#</sup>        | Male   | 37          | 0.5                           | 614                        | 836                        | 4.9                               |
| PuP32 <sup>#</sup>         | Female | 45          | 1                             | 908                        | 585                        | 3.6                               |
| VC33 <sup>*#</sup>         | Female | 52          | 9                             | 540                        | 942                        | 2.8                               |

|                          |        |    |     |      |      |     |
|--------------------------|--------|----|-----|------|------|-----|
| VC34                     | Female | 43 | 11  | 757  | 1120 | 1.7 |
| VC35 <sup>*#</sup>       | Female | 42 | 14  | 1469 | 853  | 3.0 |
| VC36 <sup>*#</sup>       | Male   | 32 | 10  | 505  | 2260 | 2.9 |
| VC37 <sup>*</sup>        | Female | 29 | 10  | 501  | 1717 | 3.0 |
| VC38 <sup>#</sup>        | Male   | 35 | 8   | 900  | 2115 | 3.0 |
| VC39                     | Female | 60 | 8   | 1253 | 3071 | 2.9 |
| VC40                     | Male   | 45 | 24  | 928  | 1066 | 2.2 |
| <b>SP41<sup>*#</sup></b> | Male   | 32 | 2   | 424  | 1764 | 4.6 |
| <b>SP42<sup>*#</sup></b> | Male   | 45 | 0.5 | 87   | 943  | 5.4 |
| <b>SP43<sup>*#</sup></b> | Male   | 43 | 0.6 | 82   | 1178 | 5.6 |
| <b>SP44<sup>*#</sup></b> | Male   | 45 | 0.5 | 268  | 793  | 4.7 |
| SP45 <sup>#</sup>        | Male   | 52 | 3   | 402  | 860  | 4.5 |
| SP46 <sup>*</sup>        | Male   | 55 | 0.5 | 376  | 495  | 4.0 |
| SP47 <sup>#</sup>        | Male   | 30 | 2   | 338  | 1543 | 4.2 |
| <b>SP48<sup>*</sup></b>  | Male   | 40 | 1   | 372  | 555  | 4.2 |

\*Represents participants enrolled for *vpr* genotyping

# Represents participants enrolled for *env* genotyping

Bold represents participants detected with known mutation

\$Represents participants with more than one mutation

**Supplementary Table 2: Summary of genotyping data in the study**

|                                                                                                           | <b>VNP</b> | <b>PuP</b> | <b>SP</b> | <b>VC</b> |
|-----------------------------------------------------------------------------------------------------------|------------|------------|-----------|-----------|
| <b><i>vpr</i> gene mutations</b>                                                                          |            |            |           |           |
| Q3R<br>(Amino acid substitution at position 3)                                                            | 1/8        | 1/9        | 0/6       | 0/4       |
| R77Q<br>(Amino acid substitution at position 77)                                                          | 5/8        | 4/9        | 5/6       | 0/4       |
| F72L<br>(Amino acid substitution at position 72)                                                          | 1/8        | 0/9        | 0/6       | 0/4       |
| Mutation in SRIG motif                                                                                    | 1/8        | 0/9        | 0/6       | 1/4       |
| W54G, R36W, I64E, L67A, I70S,<br>L64PAR and Q65R                                                          | 0/8        | 0/9        | 0/6       | 0/4       |
| <b>No tropism shift (CCR5 (R5) tropism to CXCR4 (X4) tropism) was observed in any infected individual</b> |            |            |           |           |
| <b>No distinct N-linked glycosylation pattern was observed in any infected group</b>                      |            |            |           |           |

**Supplementary Table 3: Primer sequences for genotyping of *vpr* and *env* genes**

| <b>Primer Name</b> | <b>Sequence (5'-3')</b>        | <b>HXB2 coordinates</b> |
|--------------------|--------------------------------|-------------------------|
| Pro3F              | AGANCAGAGCCAACAGCCCCACCA       | 2143-2166               |
| PolVpuR2           | CTCTCATTGCCACTGTCTTCTGCTC      | 6201-6231               |
| VifB               | ATATAGCACACAAGTAGACCCT         | 5319-5340               |
| Acc8R              | TCTCCGCTTCTTCCTGCCATAG         | 5968-5989               |
| ED3                | TTAGGCATCTCCTATGGCAGGAAGAAGCGG | 5956-5985               |
| ED14               | TCTTGCCTGGAGCTGTTTGATGCCCCAGAC | 7960-7931               |
| ED5                | ATGGGATCAAAGCCTAAAGCCATGTG     | 6556-6581               |
| ED12               | AGTGCTTCCTGCTGCTCCCAAGAACCCAAG | 7822-7792               |
| ED31               | CCTCAGCCATTACACAGGCCTGTCCAAAG  | 6816-6844               |
| ED33               | TTACAGTAGAAAAATTCCCCTC         | 7359-7380               |

## Figures

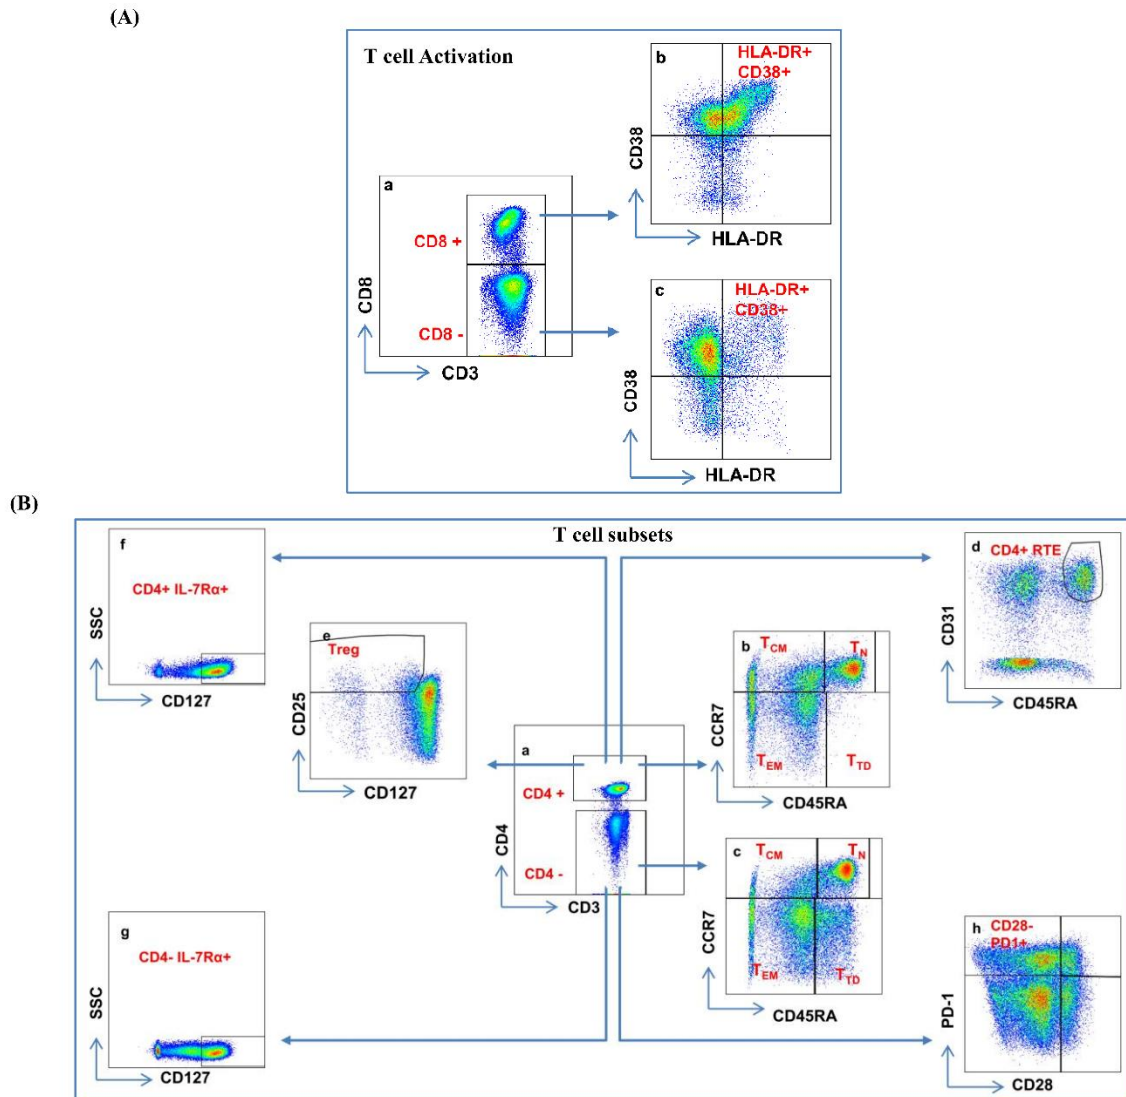

**Supplementary Figure S1: Representative flow cytometric gating strategy for CD4+ and CD8+ T cell subsets.** (A) First, (a) CD8+ and CD4+ (CD8-) T cell were identified on the basis of expression of CD3 and CD8 markers. Next, activated CD8+ (b) and CD4+ (c) T cells were gated based on co-expression of HLA-DR and CD38 in upper left quadrant. (B) CD4+ and CD8+ (CD4-) T cell were first identified on the basis of expression of CD3 and CD4 markers (a). Based on surface expression of CD45RA and CCR7, CD4+ T cell compartment (b) and CD8+ T cell compartment (c) was distinguished into naïve ( $T_N$ ), central memory ( $T_{CM}$ ), effector memory ( $T_{EM}$ ) and Terminally differentiated ( $T_{TD}$ ) T cell subsets. Surface expression of CD45RA and CD31 on CD4+ T cells was used to identify CD4+ recent thymic emigrants (CD4+ RTE) (d). Similarly based on expression of CD25 (IL-2R $\alpha$ ) and CD127 (IL-7R $\alpha$ ) on CD4+ T cell surface Tregs were identified (e). IL-7R expressing CD4+ T cells (f) and CD8+ T cells (g) were identified based on surface expression of CD127. Also, CD28 and PD-1 expression was used to identify exhaustion of total CD8+ effector population (CD8+CD28-PD1+) (h).

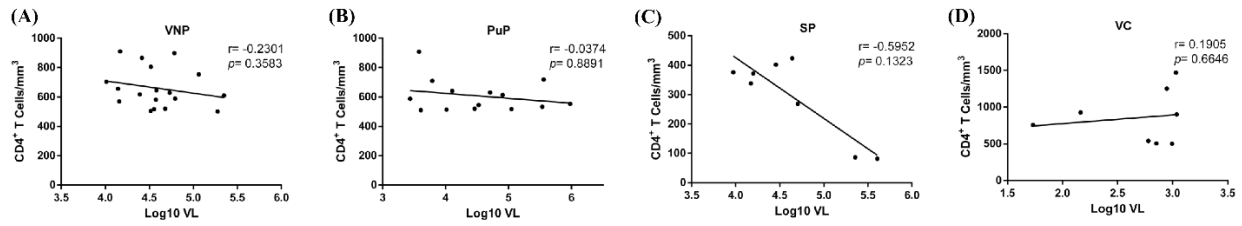

**Supplementary Figure S2: CD4+ T cell count and viral load.** (A-D) Correlation between absolute CD4+ T cell count and plasma viral load (Log<sub>10</sub> VL) in (A) VNPs, (B) PuPs, (C) SPs and (D) VCs. *p* and *r* values for associations were determined by Spearman's correlation test, with linear regression shown as line. Significant *p* values (*p*<0.05) are in bold.

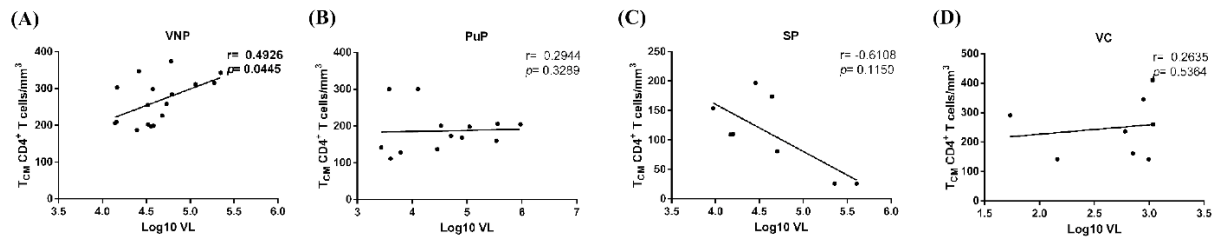

**Supplementary Figure S3: Correlation between CD4+ T<sub>CM</sub> count and plasma viral load in** (A) VNPs, (B) PuPs, (C) SPs and (D) VCs. *p* and *r* values for associations were determined by Spearman's correlation test, with linear regression shown as line. Significant *p* values (*p*<0.05) are in bold.

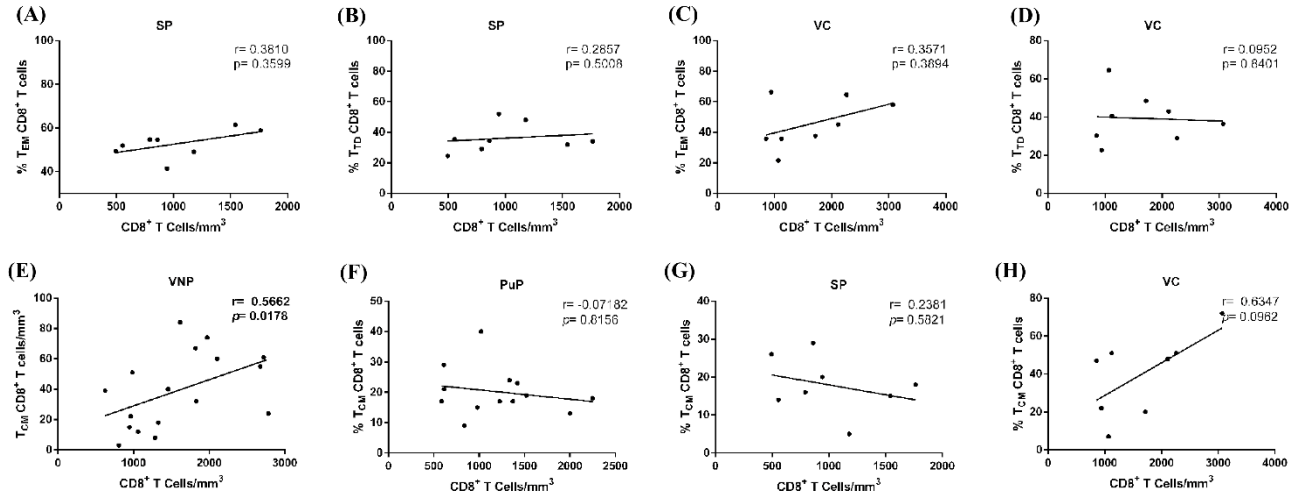

**Supplementary Figure S4: Correlation of different CD8<sup>+</sup> T cell subset with absolute CD8<sup>+</sup> T cell counts.** (A-D) Correlation of CD8<sup>+</sup> T<sub>EM</sub> and CD8<sup>+</sup> T<sub>TD</sub> cells frequency with absolute CD8<sup>+</sup> T cell counts respectively in (A, B) SPs and (C, D) VCs. (E-H) Correlation of CD8<sup>+</sup> T<sub>CM</sub> cells count with absolute CD8<sup>+</sup> T cell counts in (E) VNPs, (F) PuPs, (G) SPs and (H) VCs.  $p$  and  $r$  values for associations were determined by Spearman's correlation test, with linear regression shown as line. Significant  $p$  values ( $p < 0.05$ ) are in bold.



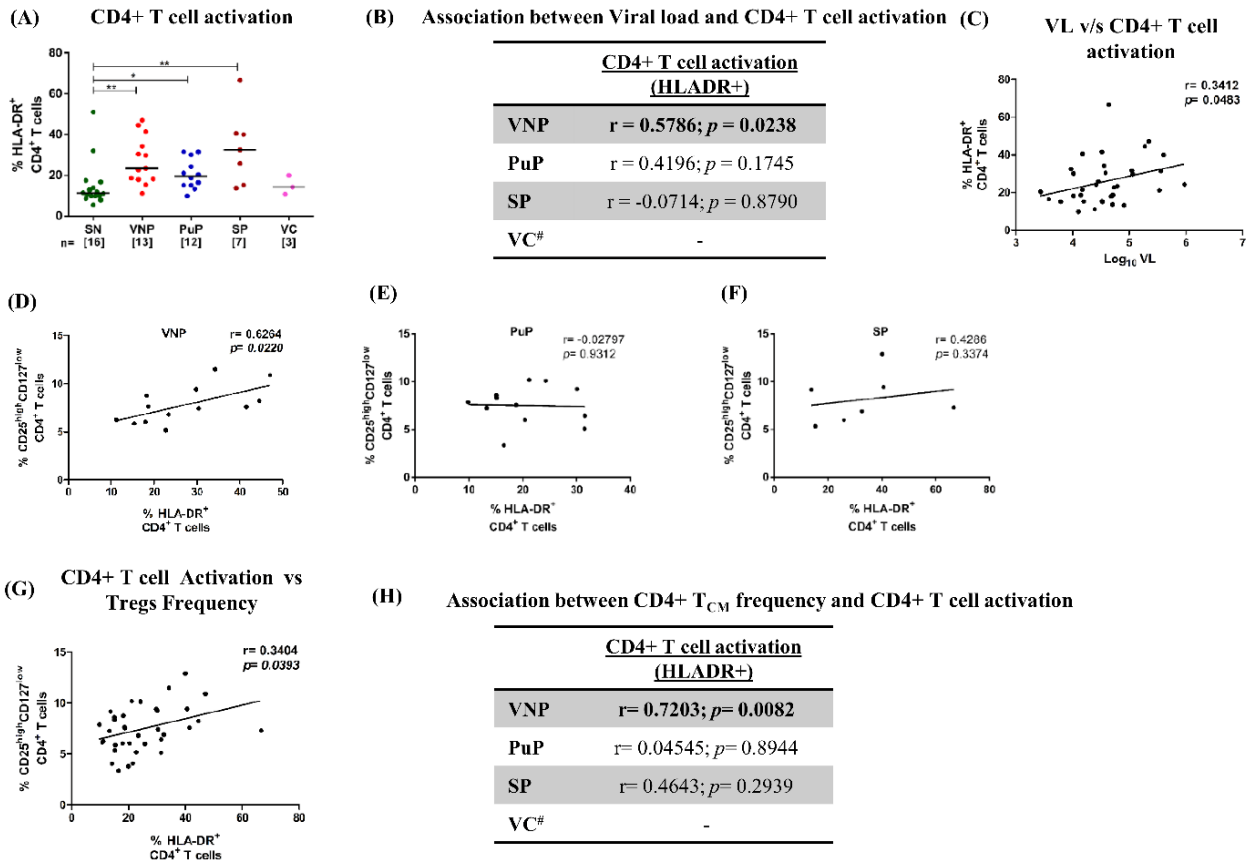

**Supplementary Figure S5: CD4+ T cell activation (CD4+ HLADR+) data based on only HLADR expression.** (A) Frequency of activated CD4+ T cells. (B) Correlation of CD4+ cell activation with plasma viral load in VNPs, PuPs, and SPs (C) Cumulative Correlation analysis across all HIV-1 infected individuals of CD4+T cell activation with plasma viral load. (D-F) Association of CD4+ T cell activation with Treg frequency respectively in (D) VNPs, (E) PuPs and (F) SPs. (G) Cumulative Correlation analysis across all HIV-1 infected individuals of CD4+T cell activation with Treg frequency. (H) Correlation of CD4+ cell activation with CD4+ central memory frequency in VNPs, PuPs, and SPs. Comparison between groups were calculated by Mann-Whitney non-parametric test ( $*p < 0.05$ ;  $**p < 0.01$ ;  $***p < 0.001$ ).  $p$  and  $r$  values for associations were determined by Spearman's correlation test, with linear regression shown as line. Significant ( $p < 0.05$ ) values are in bold. # T cell activation data were available for only 3 VCs and were not further analysed (B and H).
